# Supplementary material for: Regulation of Cyclooxygenase-2 Expression in Human T Cells by Glucocorticoid Receptor-Mediated Transrepression of Nuclear Factor of Activated T Cells
Source: MDPI journal article supplement (doi:10.3390/ijms232113275), 2022-10-31
Supplement: s1 [file s1]

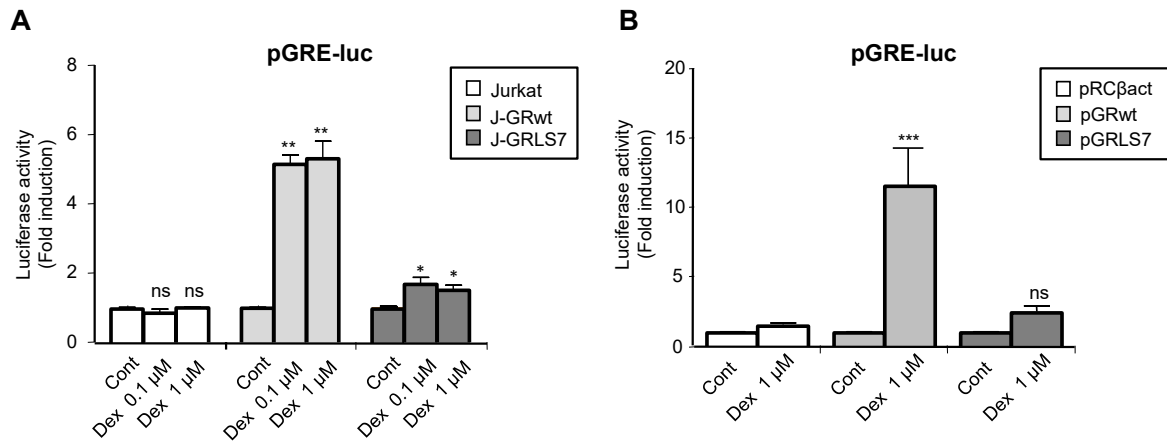

**Figure S1.** Dex mediated transactivation through a GRE is dependent on GR binding to DNA. **A)** Parental, J-GRwt and JGRLS7 Jurkat cells were transiently transfected with a luciferase reporter construct containing a GC response element (pGRE-Luc). **B)** Parental Jurkat cells were cotransfected with GR expression plasmids (pGRwt and pGRLS7) or with the empty vector pRC $\beta$ act, along with the reporter plasmid pGRE-Luc. Cells were treated for 18 h, with Dex (0.1 to 1  $\mu$ M). Luciferase activity is represented as fold induction over unstimulated cells (mean  $\pm$  SEM). ns: non significant; \* $p$ <0.05, \*\* $p$ <0.01; \*\*\* $p$ <0.001 Dex treatments vs Cont). Results shown are from a representative of three independent experiments performed in triplicate

**A**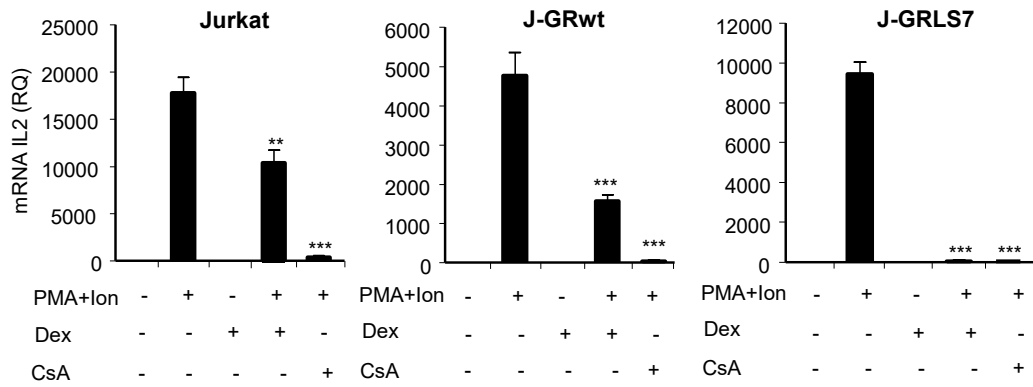**B**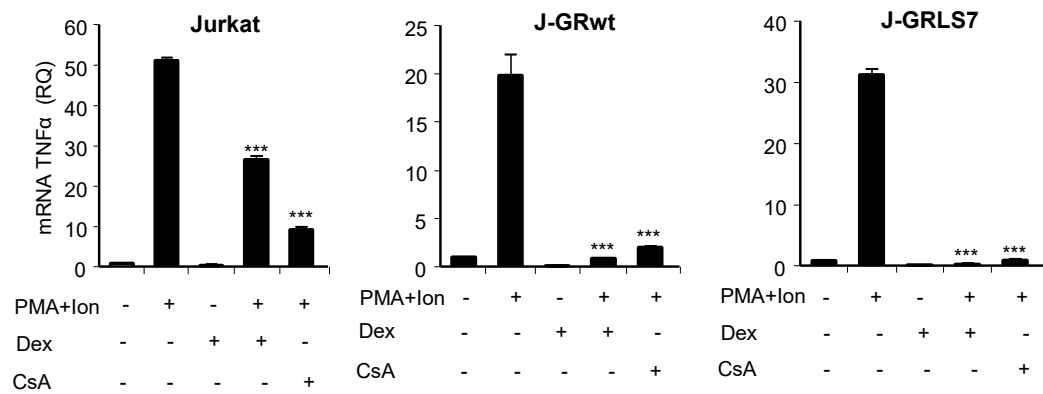

**Figure S2.** Effect of Dex on IL2 and TNF $\alpha$  expression in activated Jurkat cells. Analysis of IL2 (**A**) and TNF $\alpha$  (**B**) mRNA levels by quantitative real-time RT-PCR in Parental, J-GRwt and J-GRLS7 Jurkat cells treated with PMA+Ion (15 ng/ml +1  $\mu$ M) for 18h in the presence or absence of Dex (1  $\mu$ M) or CsA (100 ng/ml). Results are shown as RQ  $\pm$  SEM (\*\*p<0.01 \*\*\* p<0.001 vs PMA+Ion treatment). Results shown are from a representative of two independent experiments performed in triplicate.

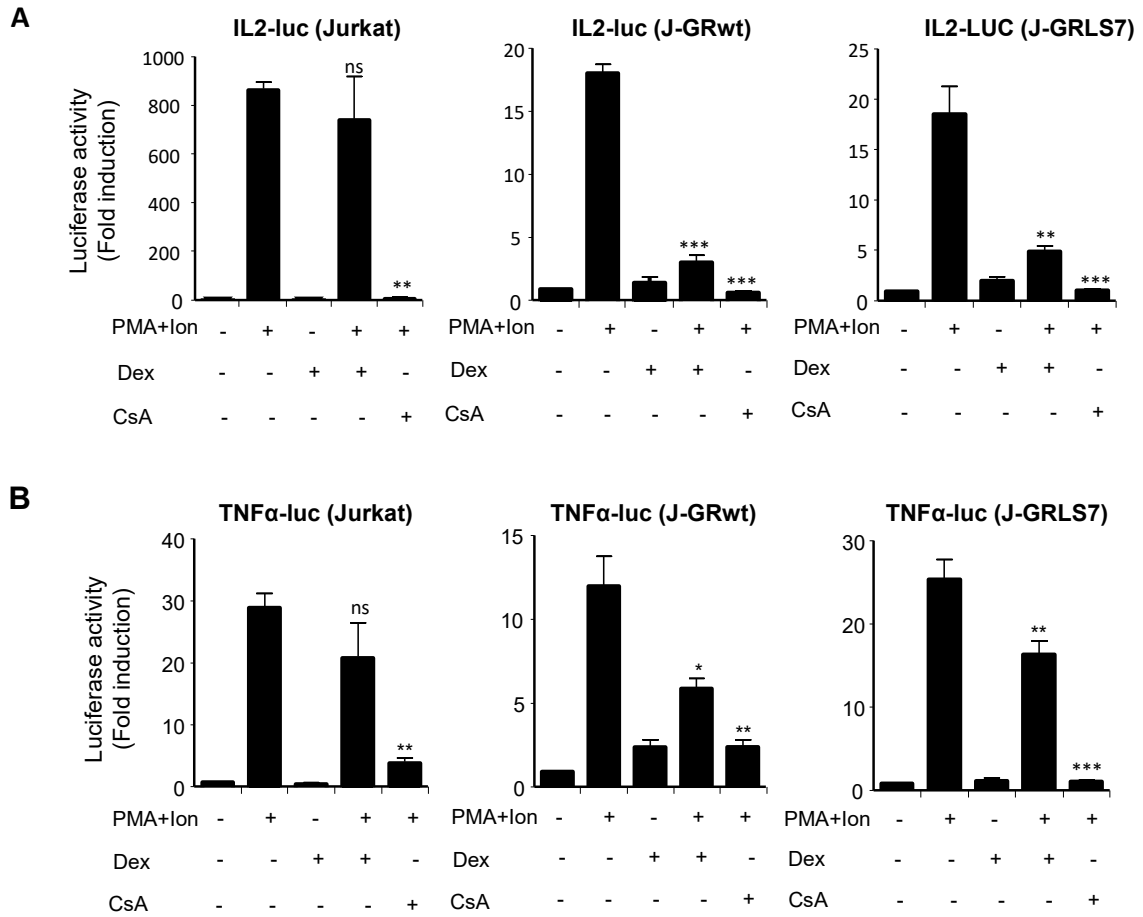

**Figure S3.** Analysis of Dex effects on IL2 and TNF $\alpha$  promoter activities. Parental, J-GRwt and J-GRLS7 Jurkat cells were transfected with luciferase reporter constructs bearing IL2 (**A**) or TNF $\alpha$  (**B**) promoters. Cells were cultured in the absence (Cont) or presence of PMA + Ion for 16 h and assayed for luciferase activity. Dex (1  $\mu$ M) or CsA (100 ng/ml) were added 1 h before stimulation. Results are represented as fold induction of RLUs in PMA+Ion samples over unstimulated control ones (mean  $\pm$  SEM). ns: non significant; \* $p$ <0.05, \*\* $p$ <0.01; \*\*\* $p$ <0.001 vs PMA+Ion). Results shown are from a representative of three independent experiments performed in triplicate.
